# Supplementary material for: Spatial-Temporal Survey and Occupancy-Abundance Modeling To Predict Bacterial Community Dynamics in the Drinking Water Microbiome
Source: PubMed Central journal article supplement (PMC4045074; doi:10.1128/mbio.01135-14), 2014-05-27

**Supplementary Figure S1.** (A) Shannon evenness and (B) Non-parametric Shannon diversity averaged across all sampling locations within each month did not show significant correlations to measured water quality parameters.

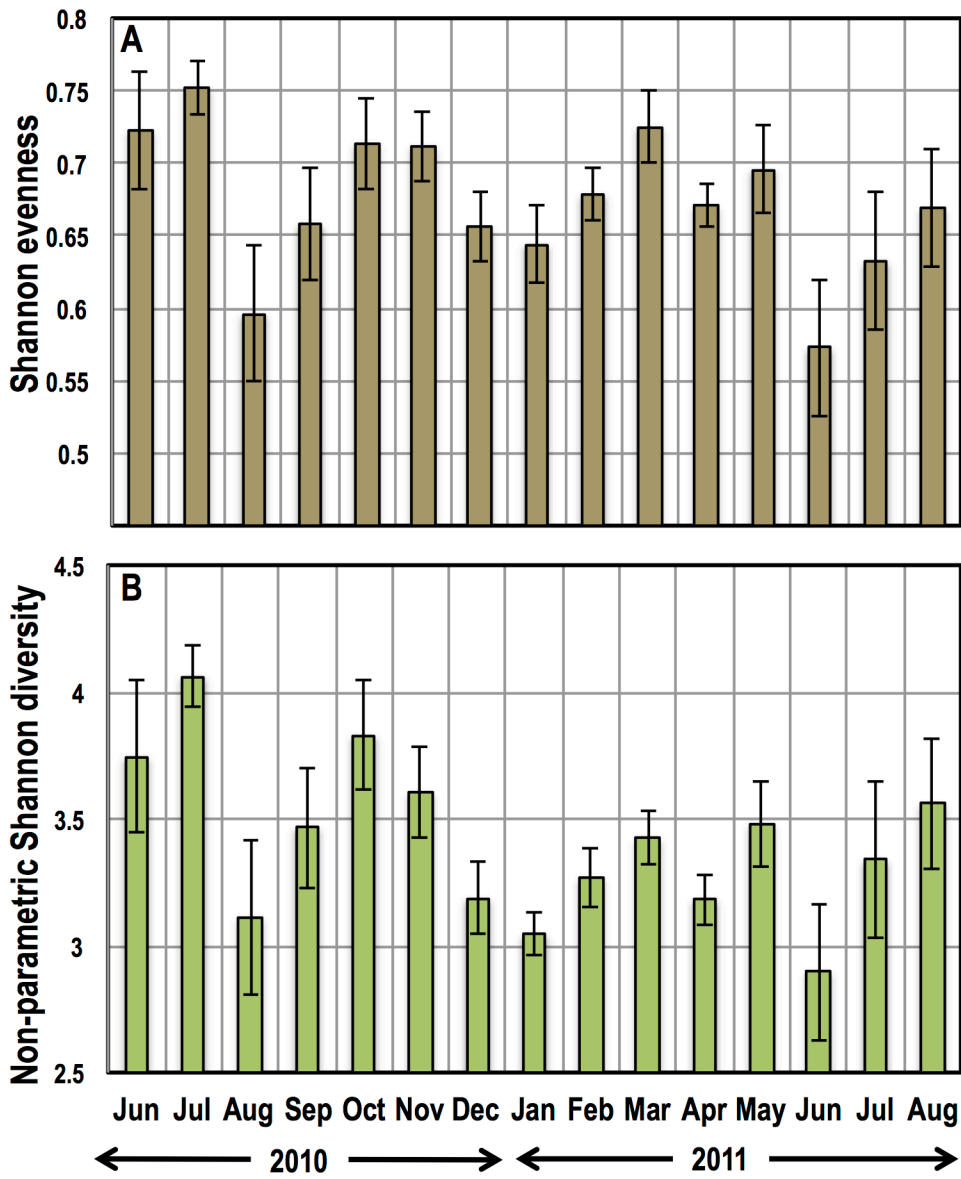

Supplement: mbo003141850sf01.pdf [file mbo003141850sf01.pdf]
