# Supplementary material for: Spatial-Temporal Survey and Occupancy-Abundance Modeling To Predict Bacterial Community Dynamics in the Drinking Water Microbiome
Source: PubMed Central journal article supplement (PMC4045074; doi:10.1128/mbio.01135-14), 2014-05-27

**Supplementary Figure S2:** The contribution of site specific (red) and site non-specific (blue) OTUs to the relative abundance (top panel) and membership (bottom panel) at each sampling location for the entire sampling period.

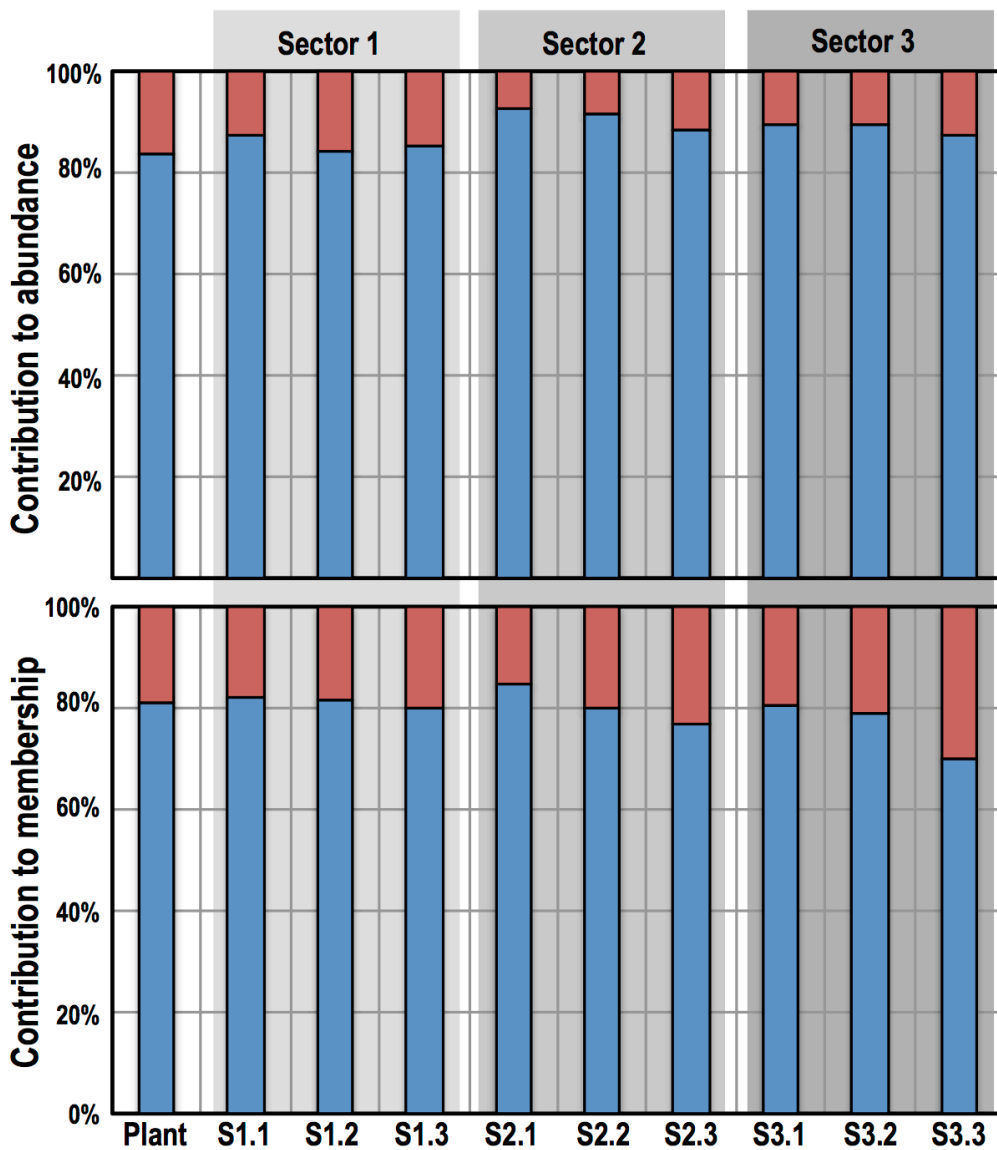

Supplement: mbo003141850sf02.pdf [file mbo003141850sf02.pdf]
