# Supplementary material for: Spatial-Temporal Survey and Occupancy-Abundance Modeling To Predict Bacterial Community Dynamics in the Drinking Water Microbiome
Source: PubMed Central journal article supplement (PMC4045074; doi:10.1128/mbio.01135-14), 2014-05-27

**Supplementary Figure S3.** Effect of OTU filtering based on detection frequency (top panel) and relative abundance threshold (bottom panel) on Mantels  $r$ . The lower the Mantel  $r$ , the lower the correlation between the full dataset with all OTUs and the dataset with subset of OTUs based on detection frequency or relative abundance threshold.

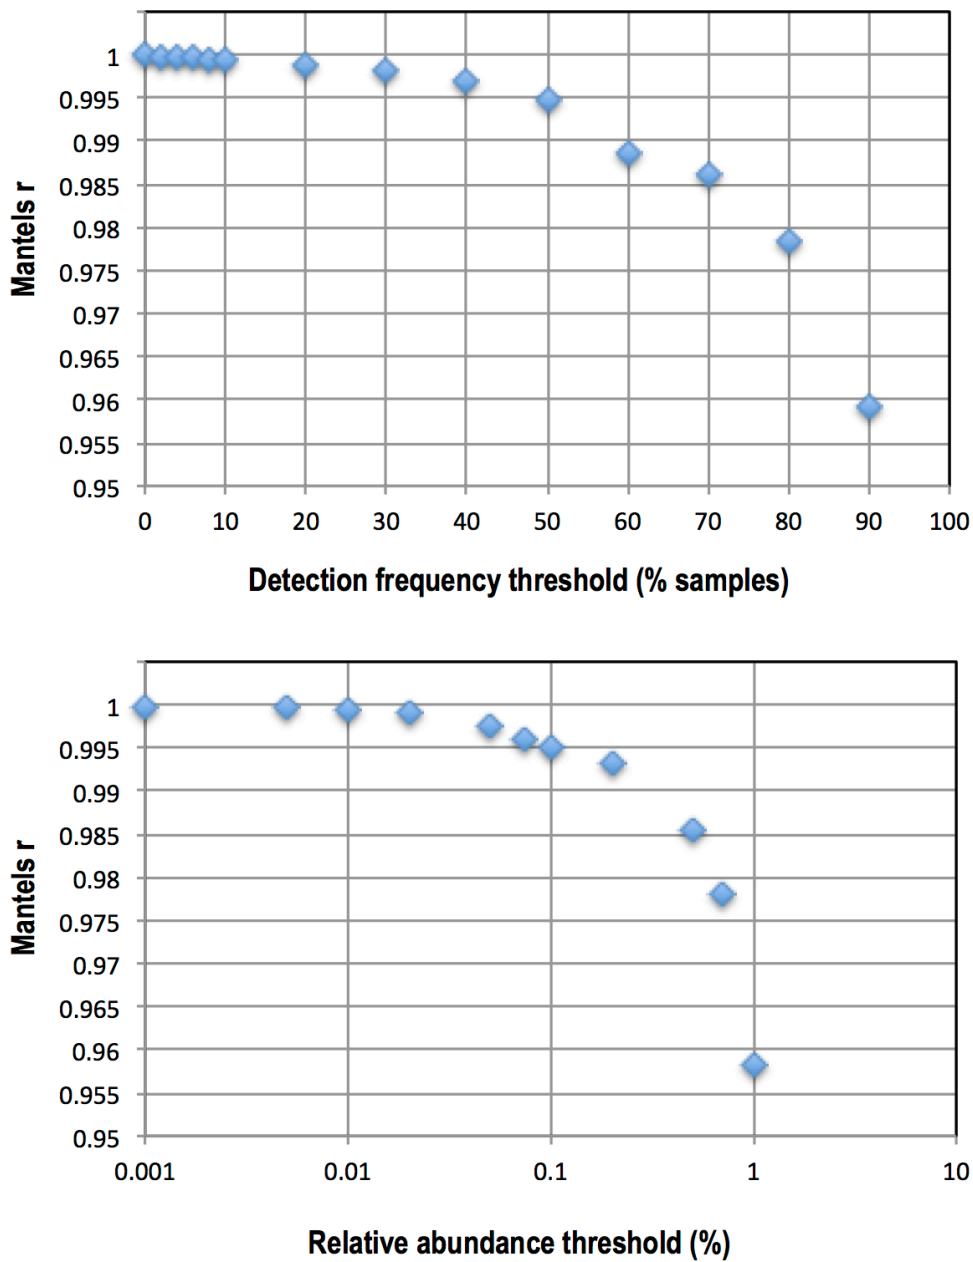

Supplement: mbo003141850sf03.pdf [file mbo003141850sf03.pdf]
